# Supplementary material for: Evaluation of a New Model of Care for People with Complications of Diabetic Retinopathy: The EMERALD Study
Source: PubMed Central journal article supplement — Ophthalmology. 2021 Apr;128(4):561–73. doi: 10.1016/j.ophtha.2020.10.030 (PMC7980088; doi:10.1016/j.ophtha.2020.10.030), 2021-04
Supplement: mmc1.pdf [file mmc1.pdf]

**Supplementary Table S1. List of principal analyses (main and sensitivity analyses, and additional post-hoc analyses of diagnostic accuracy) <sup>a</sup>**

| Analysis name          | Level of Analysis | DME index test positive                                                                  | DME reference standard                                                                                                                                                         | PDR index test positive                                                                                                                                                                      | PDR reference standard                                                                                                                                            |
|------------------------|-------------------|------------------------------------------------------------------------------------------|--------------------------------------------------------------------------------------------------------------------------------------------------------------------------------|----------------------------------------------------------------------------------------------------------------------------------------------------------------------------------------------|-------------------------------------------------------------------------------------------------------------------------------------------------------------------|
| Main                   | Person            | Ophthalmic graders <b>referral</b> <sup>b</sup> for DME based on SD-OCT images           | Ophthalmologist face-to-face clinical evaluation using slit-lamp biomicroscopy with the addition of SD-OCT scans to assess active DME in either eye                            | Ophthalmic graders <b>referral</b> for PDR based on <b>ultra-wide field fundus images</b> / Ophthalmic graders <b>referral</b> for PDR based on <b>7-field ETDRS fundus images</b>           | Ophthalmologist face-to-face clinical evaluation using slit-lamp biomicroscopy to assess active PDR in either eye                                                 |
| Sensitivity analysis 1 | Person            | Ophthalmic graders <b>identified active DME</b> based on SD-OCT images                   | Ophthalmologist face-to-face clinical evaluation using slit-lamp biomicroscopy with the addition of SD-OCT scans to assess active DME in either eye                            | Ophthalmic graders <b>identified active PDR</b> based on <b>ultra-wide field fundus images</b> / Ophthalmic graders <b>identified active PDR</b> based on <b>7-field ETDRS fundus images</b> | Ophthalmologist face-to-face clinical evaluation using slit-lamp biomicroscopy to assess active PDR in either eye                                                 |
| Sensitivity analysis 2 | Person            | Ophthalmic graders <b>referral</b> for DME based on SD-OCT images                        | Ophthalmologist face-to-face clinical evaluation using slit-lamp biomicroscopy with the addition of SD-OCT scans to assess active DME in either eye <b>requiring treatment</b> | Ophthalmic graders <b>referral</b> for PDR based on <b>ultra-wide field fundus images</b> / Ophthalmic graders <b>referral</b> for PDR based on <b>7-field ETDRS fundus images</b>           | Ophthalmologist face-to-face clinical evaluation using slit-lamp biomicroscopy to assess active PDR in either eye <b>requiring treatment</b>                      |
| Sensitivity analysis 3 | Person            | Ophthalmic graders <b>identified central involving</b> active DME based on SD-OCT images | Ophthalmologist face-to-face clinical evaluation using slit-lamp biomicroscopy with the addition of SD-OCT scans to assess <b>central involving</b> active DME in either eye   | ..                                                                                                                                                                                           | ..                                                                                                                                                                |
| Sensitivity analysis 4 | Person            | ..                                                                                       | ..                                                                                                                                                                             | Ophthalmic graders <b>referral</b> for PDR based on <b>ultra-wide field fundus images</b> / Ophthalmic graders <b>referral</b> for PDR based on <b>7-field ETDRS fundus images</b>           | Ophthalmologist face-to-face clinical evaluation using slit-lamp biomicroscopy to assess <b>active PDR with pre-retinal or vitreous haemorrhage</b> in either eye |

|                        |        |                                                                                     |                                                                                                                                                                              |                                                                                                                                                                                                                               |                                                                                                                                                                                                                                                                                                                                                                                                                                                                                                         |
|------------------------|--------|-------------------------------------------------------------------------------------|------------------------------------------------------------------------------------------------------------------------------------------------------------------------------|-------------------------------------------------------------------------------------------------------------------------------------------------------------------------------------------------------------------------------|---------------------------------------------------------------------------------------------------------------------------------------------------------------------------------------------------------------------------------------------------------------------------------------------------------------------------------------------------------------------------------------------------------------------------------------------------------------------------------------------------------|
| Sensitivity analysis 5 | Person | ..                                                                                  | ..                                                                                                                                                                           | Ophthalmic graders <b>referral</b> for PDR based on <b>ultra-wide field fundus images</b> /<br>Ophthalmic graders <b>referral</b> for PDR based on <b>7-field ETDRS fundus images</b>                                         | <b>Enhanced standard</b>                                                                                                                                                                                                                                                                                                                                                                                                                                                                                |
| Sensitivity analysis 6 | Person | Ophthalmic graders referral for DME based on SD-OCT images in <b>routine clinic</b> | Ophthalmologist face-to-face clinical evaluation using slit-lamp biomicroscopy with the addition of SD-OCT scans to assess active DME in either eye in <b>routine clinic</b> | Ophthalmic graders <b>referral</b> for PDR based on <b>ultra-wide field fundus images in routine clinic</b> /<br>Ophthalmic graders <b>referral</b> for PDR based on <b>7-field ETDRS fundus images in routine clinic</b>     | Ophthalmologist face-to-face clinical evaluation using slit-lamp biomicroscopy to assess active PDR in either eye in <b>routine clinic</b>                                                                                                                                                                                                                                                                                                                                                              |
| Additional 1           | Person | ..                                                                                  | ..                                                                                                                                                                           | <b>Ophthalmologist</b> assessment <b>identified active PDR</b> based on <b>ultra-wide field fundus images</b> /<br><b>Ophthalmologist</b> assessment <b>identified active PDR</b> based on <b>7-field ETDRS fundus images</b> | Ophthalmologist face-to-face clinical evaluation using slit-lamp biomicroscopy to assess active PDR in either eye                                                                                                                                                                                                                                                                                                                                                                                       |
| Additional 2           | Person | ..                                                                                  | ..                                                                                                                                                                           | <b>Ophthalmologist</b> assessment <b>identified active PDR</b> based on <b>ultra-wide field fundus images</b> /<br><b>Ophthalmologist</b> assessment <b>identified active PDR</b> based on <b>7-field ETDRS fundus images</b> | Ophthalmologist face-to-face clinical evaluation using slit-lamp biomicroscopy to assess <b>active PDR with pre-retinal or vitreous haemorrhage</b> in either eye                                                                                                                                                                                                                                                                                                                                       |
| Additional 3           | Person | ..                                                                                  | ..                                                                                                                                                                           | <b>Ophthalmic graders referral</b> for PDR based on <b>ultra-wide field fundus images</b> /<br><b>Ophthalmic graders referral</b> for PDR based on <b>7-field ETDRS fundus images</b>                                         | <b>Ophthalmologist face-to-face clinical evaluation using slit-lamp biomicroscopy</b> to assess active PDR in either eye <b>plus Ophthalmologist</b> assessment identified active PDR in either eye based on <b>ultra-wide field fundus images</b> /<br><b>Ophthalmologist face-to-face clinical evaluation using slit-lamp biomicroscopy</b> to assess active PDR in either eye <b>plus Ophthalmologist</b> assessment identified active PDR in either eye based on <b>7-field ETDRS fundus images</b> |

Note: Ophthalmologists face-to-face clinical evaluation using slit-lamp biomicroscopy with the addition of SD-OCT scans = reference standard for DME (i.e. standard care); ophthalmologists face-to-face clinical evaluation using slit-lamp biomicroscopy = reference standard for PDR (i.e. standard care).

<sup>a</sup> Principal analyses were focused on “eligible participants for the new pathway” and referred to analysis done using data from the eligible eye(s) of each patient included in EMERALD [Note: All patients included in EMERALD were eligible for the purpose of evaluating one or other disease or both (DME, PDR); they may have contributed with data from “eligible eyes” if they have had DME, PDR, or both in one or both eyes which were previously successfully treated, becoming stable at one point following treatment – see Methods section].

Additional post-hoc analyses on PDR (labelled in the table as ‘additional 1-3’) that were not listed in the statistical analysis plan were conducted in light of the main PDR results to understand the content and potential value of the two imaging modalities better along with reliability of the ophthalmologists face-to-face clinical evaluation using slit-lamp biomicroscopy reference standard for PDR.

<sup>b</sup> grader referral for DME or PDR= “active” + “unsure” + “ungradable”

SD-OCT = spectral domain optical coherence tomography; DME = Diabetic macular edema; PDR = proliferative diabetic retinopathy; ETDRS = Early treatment diabetic retinopathy study.
