# Supplementary material for: Evaluation of a New Model of Care for People with Complications of Diabetic Retinopathy: The EMERALD Study
Source: PubMed Central journal article supplement — Ophthalmology. 2021 Apr;128(4):561–73. doi: 10.1016/j.ophtha.2020.10.030 (PMC7980088; doi:10.1016/j.ophtha.2020.10.030), 2021-04
Supplement: mmc4.pdf [file mmc4.pdf]

**Supplementary Table S4. Missing images at person level**

|                                                                                                       | No of participants (N=397) |
|-------------------------------------------------------------------------------------------------------|----------------------------|
| <b>All images are available (all three<sup>a</sup> imaging modalities for both eyes <sup>b</sup>)</b> | 345                        |
| <b>Missing at least one imaging assessment</b>                                                        | 52                         |
| <b>Image missing – patient would need referral</b>                                                    | 17                         |
| No view of fundus - Vitreous Haemorrhage                                                              | 2                          |
| No view of fundus - Corneal graft                                                                     | 1                          |
| Poor pupillary dilation                                                                               | 4                          |
| Patient unable to cooperate with imaging                                                              | 1                          |
| Patient unable to sit at the camera                                                                   | 2                          |
| Media opacity                                                                                         | 5                          |
| Patient could not stand the light                                                                     | 1                          |
| Unable to see fundus due to pathology                                                                 | 1                          |
| <b>Image missing – missing</b>                                                                        | 35                         |
| Patient does not attend for the taking of the image                                                   | 9                          |
| Only one eye image captured <sup>c</sup>                                                              | 5                          |
| Images not recorded correctly                                                                         | 11                         |
| <b>Other unknown reason</b>                                                                           | 10                         |

Note: <sup>a</sup> spectral domain optical coherence tomography scans, ultra-wide field fundus images and 7-field Early treatment diabetic retinopathy study images.

<sup>b</sup> Five eyes in total couldn't be imaged. For these five patients, only three imaging assessments per patient were obtained.

<sup>c</sup> Just at the initiation of the study and until an amendment was implemented images were only obtained in "eligible" eyes.
