# Supplementary material for: Evaluation of a New Model of Care for People with Complications of Diabetic Retinopathy: The EMERALD Study
Source: PubMed Central journal article supplement — Ophthalmology. 2021 Apr;128(4):561–73. doi: 10.1016/j.ophtha.2020.10.030 (PMC7980088; doi:10.1016/j.ophtha.2020.10.030), 2021-04
Supplement: mmc5.pdf [file mmc5.pdf]

**Supplementary Table S5. Diabetic macular edema assessment by graders compared with the reference standard**

|                                   | Graders SD-OCT <sup>b</sup>        |                                   | Reference standard <sup>b</sup>    |                                   |
|-----------------------------------|------------------------------------|-----------------------------------|------------------------------------|-----------------------------------|
|                                   | Right Eye<br>(N=396 <sup>a</sup> ) | Left Eye<br>(N=393 <sup>a</sup> ) | Right Eye<br>(N=396 <sup>a</sup> ) | Left Eye<br>(N=393 <sup>a</sup> ) |
| <b>Total DME present (Active)</b> | 198                                | 188                               | 142                                | 120                               |
| <b>No DME</b>                     | 168                                | 175                               | 253                                | 269                               |
| <b>Unsure if DME present</b>      | 13                                 | 12                                | ..                                 | ..                                |
| <b>Ungradable</b>                 | 6                                  | 5                                 | 1                                  | 4                                 |
| <b>No images</b>                  | 11                                 | 13                                | ..                                 | ..                                |

Note: SD-OCT = spectral domain optical coherence tomography; DME = Diabetic macular edema

<sup>a</sup> 5 eyes were not assessed: 1 right eye was not assessed as it was blind; 4 left eyes were not assessed as they were blind (n=2), or had a total retinal detachment (n=1) or it was an artificial eye (n=1).

<sup>b</sup> Graders SD-OCT = graders assessment based on SD-OCT images; Reference standard for DME = ophthalmologists face-to-face clinical evaluation using slit-lamp biomicroscopy with the addition of SD-OCT
