# Supplementary material for: Evaluation of a New Model of Care for People with Complications of Diabetic Retinopathy: The EMERALD Study
Source: PubMed Central journal article supplement — Ophthalmology. 2021 Apr;128(4):561–73. doi: 10.1016/j.ophtha.2020.10.030 (PMC7980088; doi:10.1016/j.ophtha.2020.10.030), 2021-04
Supplement: mmc6.pdf [file mmc6.pdf]

**Supplementary Table S6. Proliferative diabetic retinopathy assessment by graders and ophthalmologists based on fundus images compared with reference standard**

|                              | Graders 7-field ETDRS <sup>b</sup> |                                   | Ophthalmologist 7-field ETDRS <sup>b</sup> |                                   | Graders ultrawide field <sup>b</sup> |                                   | Ophthalmologist ultrawide field <sup>b</sup> |                                   | Reference standard <sup>b</sup>    |                                   |
|------------------------------|------------------------------------|-----------------------------------|--------------------------------------------|-----------------------------------|--------------------------------------|-----------------------------------|----------------------------------------------|-----------------------------------|------------------------------------|-----------------------------------|
|                              | Right Eye<br>(N=396 <sup>a</sup> ) | Left Eye<br>(N=393 <sup>a</sup> ) | Right Eye<br>(N=396 <sup>a</sup> )         | Left Eye<br>(N=393 <sup>a</sup> ) | Right Eye<br>(N=396 <sup>a</sup> )   | Left Eye<br>(N=393 <sup>a</sup> ) | Right Eye<br>(N=396 <sup>a</sup> )           | Left Eye<br>(N=393 <sup>a</sup> ) | Right Eye<br>(N=396 <sup>a</sup> ) | Left Eye<br>(N=393 <sup>a</sup> ) |
| <b>Total PDR present</b>     | 171                                | 162                               | 185                                        | 185                               | 191                                  | 170                               | 206                                          | 213                               |                                    |                                   |
| <i>Active</i>                | 88                                 | 83                                | 58                                         | 60                                | 85                                   | 73                                | 70                                           | 75                                | 80                                 | 79                                |
| <i>Inactive</i>              | 71                                 | 65                                | 98                                         | 106                               | 95                                   | 81                                | 117                                          | 121                               | 180                                | 172                               |
| <i>Unsure if active</i>      | 12                                 | 14                                | 29                                         | 19                                | 11                                   | 16                                | 19                                           | 17                                | ..                                 | ..                                |
| <b>No PDR</b>                | 166                                | 156                               | 150                                        | 137                               | 152                                  | 162                               | 143                                          | 125                               | 134                                | 140                               |
| <b>Unsure if PDR present</b> | 20                                 | 17                                | 30                                         | 31                                | 20                                   | 21                                | 25                                           | 23                                | ..                                 | ..                                |
| <b>Ungradable</b>            | 19                                 | 27                                | 9                                          | 10                                | 16                                   | 21                                | 4                                            | 12                                | 2                                  | 2                                 |
| <b>No images</b>             | 20                                 | 31                                | 22                                         | 30                                | 17                                   | 19                                | 18                                           | 20                                | ..                                 | ..                                |

Note: PDR = proliferative diabetic retinopathy; ETDRS = Early treatment diabetic retinopathy study

<sup>a</sup> 5 eyes in total were not assessed. 1 right eye was not assessed as it was a blind eye; 4 left eyes were not assessed as they were blind (n=2), had a total retinal detachment (n=1) or it was an artificial eye (n=1).

<sup>b</sup> Graders 7-field ETDRS = graders assessment based on 7-field ETDRS fundus images; Ophthalmologist 7-field ETDRS = ophthalmologist assessment based on 7-field ETDRS fundus images; Graders ultrawide field = graders assessment based on ultra-wide field fundus images; Ophthalmologist ultrawide field = ophthalmologist assessment based on ultra-wide field fundus images; Reference standard for PDR = ophthalmologists face-to-face clinical evaluation using slit-lamp biomicroscopy.
