# Supplementary material for: Evaluation of a New Model of Care for People with Complications of Diabetic Retinopathy: The EMERALD Study
Source: PubMed Central journal article supplement — Ophthalmology. 2021 Apr;128(4):561–73. doi: 10.1016/j.ophtha.2020.10.030 (PMC7980088; doi:10.1016/j.ophtha.2020.10.030), 2021-04
Supplement: mmc7.pdf [file mmc7.pdf]

**Supplementary Table S7. Paired comparisons in sensitivity and specificity between grading of images by ophthalmic graders using ultra-wide field images and 7 field Early Treatment Diabetic Retinopathy Study fundus images (Main Analysis)**

| <b>Graders ultrawide field</b>         | <b>Graders 7-field ETDRS</b> |          | <b>Graders 7-field ETDRS</b> |          |
|----------------------------------------|------------------------------|----------|------------------------------|----------|
|                                        | Positive                     | Negative | Positive                     | Negative |
| Positive                               | 72                           | 11       | 45                           | 27       |
| Negative                               | 14                           | 4        | 35                           | 49       |
|                                        | <b>Sensitivity (n=101)</b>   |          | <b>Specificity (n=156)</b>   |          |
| <b>Ultrawide field (95% CI Wilson)</b> | 82% (74–88%)                 |          | 54% (46–61%)                 |          |
| <b>7-field ETDRS (95% CI Wilson)</b>   | 85% (76–90%)                 |          | 49% (41–56%)                 |          |
| <b>Difference (95% CI)</b>             | -3% (-14–8%)                 |          | 5% (-5–16%)                  |          |
| <b>McNemar's test p-value</b>          | P=0.55                       |          | P=0.31                       |          |

Note: ETDRS = Early treatment diabetic retinopathy study; Graders ultrawide field = graders assessment based on ultrawide field images; Graders 7-field ETDRS = graders assessment based on 7-field ETDRS images.
