# Supplementary material for: Evaluation of a New Model of Care for People with Complications of Diabetic Retinopathy: The EMERALD Study
Source: PubMed Central journal article supplement — Ophthalmology. 2021 Apr;128(4):561–73. doi: 10.1016/j.ophtha.2020.10.030 (PMC7980088; doi:10.1016/j.ophtha.2020.10.030), 2021-04
Supplement: mmc8.pdf [file mmc8.pdf]

**Supplementary Table S8. Paired comparisons in sensitivity and specificity between grading of images by ophthalmic graders using ultra-wide field images and 7 field Early Treatment Diabetic Retinopathy Study fundus images (Sensitivity analysis 1)**

| <b>Graders ultrawide field</b>         | <b>Graders 7-field ETDRS</b> |          | <b>Graders 7-field ETDRS</b> |          |
|----------------------------------------|------------------------------|----------|------------------------------|----------|
|                                        | Positive                     | Negative | Positive                     | Negative |
| Positive                               | 47                           | 14       | 22                           | 23       |
| Negative                               | 22                           | 15       | 27                           | 84       |
|                                        | <b>Sensitivity (n=98)</b>    |          | <b>Specificity (n=156)</b>   |          |
| <b>Ultrawide field (95% CI Wilson)</b> | 62% (52–71%)                 |          | 71% (64–78%)                 |          |
| <b>7-field ETDRS (95% CI Wilson)</b>   | 70% (61–79%)                 |          | 69% (61–75%)                 |          |
| <b>Difference (95% CI)</b>             | -8% (-21%–5%)                |          | 3% (-7–12%)                  |          |
| <b>McNemar's test p-value</b>          | P=0.18                       |          | P=0.57                       |          |

**Note:** ETDRS = Early treatment diabetic retinopathy study; Graders ultrawide field = graders assessment based on ultra-wide field fundus images; Graders 7-field ETDRS = graders assessment based on 7-field ETDRS fundus images.
