# Supplementary material for: Evaluation of a New Model of Care for People with Complications of Diabetic Retinopathy: The EMERALD Study
Source: PubMed Central journal article supplement — Ophthalmology. 2021 Apr;128(4):561–73. doi: 10.1016/j.ophtha.2020.10.030 (PMC7980088; doi:10.1016/j.ophtha.2020.10.030), 2021-04
Supplement: mmc9.pdf [file mmc9.pdf]

**Supplementary Table S9. Secondary Analyses at a patient level (all patients included)**

| Results             | Reference standard                                                                                                                                    | Diagnostic parameter                                                               | n/N                       | Estimate (95% CI) |                  |
|---------------------|-------------------------------------------------------------------------------------------------------------------------------------------------------|------------------------------------------------------------------------------------|---------------------------|-------------------|------------------|
| <b>SECA2A</b>       | Ophthalmic graders referral <sup>a</sup> for PDR based on ultra-wide field fundus images + Ophthalmic graders referral for DME based on SD-OCT images | Ophthalmologist face-to-face clinical evaluation using slit-lamp                   | Sensitivity (%)           | 258/270           | 96% (92–97%)     |
|                     |                                                                                                                                                       | biomicroscopy to assess active PDR and                                             | Specificity (%)           | 41/124            | 33% (25–42%)     |
|                     |                                                                                                                                                       | Ophthalmologist face-to-face clinical evaluation using slit-lamp                   | Positive likelihood ratio | ..                | 1.43 (1.26–1.62) |
|                     |                                                                                                                                                       | biomicroscopy with the addition of SD-OCT scans to assess active DME in either eye | Negative likelihood ratio | ..                | 0.13 (0.07–0.25) |
|                     | Ophthalmic graders referral for PDR based on 7-field ETDRS fundus images + Ophthalmic graders referral for DME based on SD-OCT images                 | Ophthalmologist face-to-face clinical evaluation using slit-lamp                   | Sensitivity (%)           | 253/266           | 95% (92–97%)     |
|                     |                                                                                                                                                       | biomicroscopy to assess active PDR and                                             | Specificity (%)           | 27/124            | 22% (15–30%)     |
|                     |                                                                                                                                                       | Ophthalmologist face-to-face clinical evaluation using slit-lamp                   | Positive likelihood ratio | ..                | 1.22 (1.10–1.34) |
|                     |                                                                                                                                                       | biomicroscopy with the addition of SD-OCT scans to assess active DME in either eye | Negative likelihood ratio | ..                | 0.22 (0.12–0.42) |
| <b>Additional 4</b> | Ophthalmic graders identified active PDR based on ultra-wide field fundus images + Ophthalmic graders identified active DME based on SD-OCT images    | Ophthalmologist face-to-face clinical evaluation using slit-lamp                   | Sensitivity (%)           | 245/263           | 93% (89–96%)     |
|                     |                                                                                                                                                       | biomicroscopy to assess active PDR and                                             | Specificity (%)           | 56/117            | 48% (39–57%)     |
|                     |                                                                                                                                                       | Ophthalmologist face-to-face clinical evaluation using slit-lamp                   | Positive likelihood ratio | ..                | 1.79 (1.50–2.13) |
|                     |                                                                                                                                                       | biomicroscopy with the addition of SD-OCT scans to assess active DME in either eye | Negative likelihood ratio | ..                | 0.14 (0.09–0.23) |

|               |                                                                                                                                                          |                                                                                                                                                                                                                                                             |                           |         |                  |
|---------------|----------------------------------------------------------------------------------------------------------------------------------------------------------|-------------------------------------------------------------------------------------------------------------------------------------------------------------------------------------------------------------------------------------------------------------|---------------------------|---------|------------------|
|               | Ophthalmic graders identified active PDR based on 7-field ETDRS fundus images + Ophthalmic graders identified active DME based on SD-OCT images          | Ophthalmologist face-to-face clinical evaluation using slit-lamp biomicroscopy to assess active PDR and Ophthalmologist face-to-face clinical evaluation using slit-lamp biomicroscopy with the addition of SD-OCT scans to assess active DME in either eye | Sensitivity (%)           | 242/260 | 93% (89–96%)     |
|               |                                                                                                                                                          |                                                                                                                                                                                                                                                             | Specificity (%)           | 45/117  | 38% (30–48%)     |
|               |                                                                                                                                                          |                                                                                                                                                                                                                                                             | Positive likelihood ratio | ..      | 1.51 (1.31–1.75) |
|               |                                                                                                                                                          |                                                                                                                                                                                                                                                             | Negative likelihood ratio | ..      | 0.18 (0.11–0.30) |
| <b>SECA2B</b> | Ophthalmic graders referral for PDR based on ultra-wide field fundus images + Ophthalmic graders referral for DME based on SD-OCT images + Visual Acuity | Ophthalmologist face-to-face clinical evaluation using slit-lamp biomicroscopy to assess active PDR and Ophthalmologist face-to-face clinical evaluation using slit-lamp biomicroscopy with the addition of SD-OCT scans to assess active DME in either eye | Sensitivity (%)           | 263/271 | 97% (94–99%)     |
|               |                                                                                                                                                          |                                                                                                                                                                                                                                                             | Specificity (%)           | 26/124  | 21% (15–29%)     |
|               |                                                                                                                                                          |                                                                                                                                                                                                                                                             | Positive likelihood ratio | ..      | 1.23 (1.12–1.35) |
|               |                                                                                                                                                          |                                                                                                                                                                                                                                                             | Negative likelihood ratio | ..      | 0.14 (0.07–0.30) |
|               | Ophthalmic graders referral for PDR based on 7-field ETDRS fundus images + Ophthalmic graders referral for DME based on SD-OCT images + Visual Acuity    | Ophthalmologist face-to-face clinical evaluation using slit-lamp biomicroscopy to assess active PDR and Ophthalmologist face-to-face clinical evaluation using slit-lamp biomicroscopy with the addition of SD-OCT scans to assess active DME in either eye | Sensitivity (%)           | 262/270 | 97% (94–98%)     |
|               |                                                                                                                                                          |                                                                                                                                                                                                                                                             | Specificity (%)           | 20/124  | 16% (11–24%)     |
|               |                                                                                                                                                          |                                                                                                                                                                                                                                                             | Positive likelihood ratio | ..      | 1.16 (1.07–1.25) |
|               |                                                                                                                                                          |                                                                                                                                                                                                                                                             | Negative likelihood ratio | ..      | 0.18 (0.08–0.41) |
| <b>SECA2C</b> | Ophthalmic graders referral for PDR                                                                                                                      | Ophthalmologist face-to-face clinical                                                                                                                                                                                                                       | Sensitivity (%)           | 174/178 | 98% (94–99%)     |
|               |                                                                                                                                                          |                                                                                                                                                                                                                                                             | Specificity (%)           | 30/217  | 14% (10–19%)     |

|                                                                                                                                                       |                                                                                                                                                                                                                                                                                 |                           |         |                  |
|-------------------------------------------------------------------------------------------------------------------------------------------------------|---------------------------------------------------------------------------------------------------------------------------------------------------------------------------------------------------------------------------------------------------------------------------------|---------------------------|---------|------------------|
| based on ultra-wide field fundus images + Ophthalmic graders referral for DME based on SD-OCT images + Visual Acuity                                  | evaluation using slit-lamp biomicroscopy to assess active PDR and Ophthalmologist face-to-face clinical evaluation using slit-lamp biomicroscopy with the addition of SD-OCT scans to assess active DME in either eye requiring treatment                                       | Positive likelihood ratio | ..      | 1.13 (1.07–1.20) |
|                                                                                                                                                       |                                                                                                                                                                                                                                                                                 | Negative likelihood ratio | ..      | 0.16 (0.06–0.45) |
| Ophthalmic graders referral for PDR based on 7-field ETDRS fundus images + Ophthalmic graders referral for DME based on SD-OCT images + Visual Acuity | Ophthalmologist face-to-face clinical evaluation using slit-lamp biomicroscopy to assess active PDR and Ophthalmologist face-to-face clinical evaluation using slit-lamp biomicroscopy with the addition of SD-OCT scans to assess active DME in either eye requiring treatment | Sensitivity (%)           | 174/177 | 98% (95–99%)     |
|                                                                                                                                                       |                                                                                                                                                                                                                                                                                 | Specificity (%)           | 25/217  | 12% (8–16%)      |
|                                                                                                                                                       |                                                                                                                                                                                                                                                                                 | Positive likelihood ratio | ..      | 1.11 (1.06–1.17) |
|                                                                                                                                                       |                                                                                                                                                                                                                                                                                 | Negative likelihood ratio | ..      | 0.15 (0.05–0.48) |

Note: SECA = secondary analysis; SD-OCT = spectral domain optical coherence tomography; DME = Diabetic macular edema; PDR = proliferative diabetic retinopathy; ETDRS = Early treatment diabetic retinopathy study.

Reference standard for DME = Ophthalmologist face-to-face clinical evaluation using slit-lamp biomicroscopy with the addition of SD-OCT scans; reference standard for PDR = Ophthalmologist face-to-face clinical evaluation using slit-lamp biomicroscopy; Visual Acuity = If visual acuity <6/12 it was considered the patient should be referred to the ophthalmologist.

<sup>a</sup> grader referral for DME/PDR = “active” + “unsure” + “ungradable”
