# Supplementary material for: Evaluation of a New Model of Care for People with Complications of Diabetic Retinopathy: The EMERALD Study
Source: PubMed Central journal article supplement — Ophthalmology. 2021 Apr;128(4):561–73. doi: 10.1016/j.ophtha.2020.10.030 (PMC7980088; doi:10.1016/j.ophtha.2020.10.030), 2021-04
Supplement: mmc10.pdf [file mmc10.pdf]

**Supplementary Table S10. Time (in minutes) taken to complete specified activities per patient by ophthalmic photographers/imaging technicians, ophthalmic graders and ophthalmologists**

| <b>Time-related activity</b>                                                                                 | <b>N</b> | <b>Mean</b> | <b>SD</b> | <b>Median</b> | <b>Min</b> | <b>Max</b> |
|--------------------------------------------------------------------------------------------------------------|----------|-------------|-----------|---------------|------------|------------|
| Reference Standard:<br>Ophthalmologists face-to-face<br>clinical evaluation<br>using slit-lamp biomicroscopy | 380      | 15.3        | 7.6       | 14.0          | 4.0        | 50.0       |
| Ophthalmic photographer / imaging<br>technician obtaining 7-field ETDRS<br>images                            | 267      | 15.3        | 8.4       | 13.0          | 2.0        | 57.0       |
| Ophthalmic photographer/ imaging<br>technician<br>obtaining ultra-wide field fundus<br>images                | 272      | 10.4        | 7.2       | 9.0           | 2.0        | 60.0       |
| Ophthalmic Grader reading 7-field<br>ETDRS fundus images                                                     | 267      | 10.6        | 6.5       | 9.0           | 2.0        | 58.0       |
| Ophthalmic graders reading ultra-<br>wide field fundus images                                                | 264      | 9.3         | 5.9       | 8.0           | 1.0        | 41.0       |
| Ophthalmologist reading 7-field<br>ETDRS images                                                              | 281      | 11.9        | 5.00      | 11.0          | 2.0        | 31.0       |
| Ophthalmologists reading ultra-wide<br>field fundus images                                                   | 268      | 10.1        | 4.0       | 9.5           | 2.0        | 28.0       |
| Grader reading SD-OCT images                                                                                 | 248      | 4.16        | 3.3       | 4.0           | 1.0        | 31.0       |

Note: ETDRS = Early treatment diabetic retinopathy study; SD-OCT = spectral domain optical coherence tomography.
